# Supplementary material for: Comment on “Thermal infrared observations of a western United States biomass burning aerosol plume” by Sorenson et al. (2024)
Source: Copernicus journal article supplement (doi:10.5194/egusphere-2025-2932), 2025-08-14
Supplement: Supplementary file 1 [file egusphere-2025-2932-supplement.zip]

## **Supplement**

**Movie S01.** Animation of Dixie-fire-area GOES East red-channel visible reflectance, 22 July 2021, 19:00-23:00 UTC.

**Movie S02.** Same as Movie S1 except for GOES 2.2  $\mu\text{m}$  reflectance.

**Movie S03.** Animation of Dixie-fire-area GOES West 2.2  $\mu\text{m}$  reflectance, 20 July 2021, 19:00-23:00 UTC. Southwestward dot is placed at S24's Figure 2 orange mark; northeastward dot is at their green mark.

**Movie S04.** Animation of Reno (KRGX) NEXRAD 2 km constant altitude plan position indicator (CAPPI) reflectivity., 20 July, from early afternoon (20:27 UTC) to post sunset, 21 July, 04:21 UTC). The background layer is GOES West 3.9  $\mu\text{m}$  Dixie fire hotspots, red pixels. Dot markers, from southwest to northeast, are S24's Figure 2 orange and green spots, and S24's distant-echo (Their Figure 3j-l) spot, respectively. KRGX location is marked by the purple dot.

**Movie S05.** Post-sunset animation of Dixie-fire-area GOES West clean window IR BT, 21 July, 03:40-07:00 UTC.

**Movie S06.** Same as Movie S05, except for GOES East and 23 July.

**Movie S07.** Same as Movie S05, except for 05 August.

**Movie S08.** Post-sunset animation of northern California and Oregon GOES West clean window IR BT, 09 September 2020, 02:30-07:00 UTC.

**Movie S09.** Animation of KBBX NEXRAD 3 km CAPPI reflectivity., 22 July, from early daylight (13:30 UTC) to late afternoon, (23:59 UTC). Image background, GOES 3.9  $\mu\text{m}$  BT. Red pixels signify the Dixie fire hot spots. ASOS station O05 is marked with a dot and annotated.

**Movie S10.** Animation of GOES East clean window IR BT between 13:30 and 23:59 UTC 22 July. The map domain includes the distant ASOS station AAT, marked along with O05.
